# Supplementary material for: Exploring Neuronal Vulnerability to Head Trauma Using a Whole Exome Approach
Source: PubMed Central journal article supplement (PMC7462038; doi:10.1089/neu.2019.6962), 2020-08-14
Supplement: Supp_Appendix1.pdf [file Supp_Appendix1.pdf]

## Supplementary Data

SUPPLEMENTARY APPENDIX S1

| <i>Tier 1</i>   | <i>Tier 2</i>     | <i>Tier 3</i>   |
|-----------------|-------------------|-----------------|
| <i>ABCD1</i>    | <i>ABHD14B</i>    | <i>ACAN</i>     |
| <i>ABCD1P2</i>  | <i>ABHD17AP2</i>  | <i>ADAMTS2</i>  |
| <i>ABCD1P3</i>  | <i>APTR</i>       | <i>ADAMTS9</i>  |
| <i>ABCD1P4</i>  | <i>ATP2B1</i>     | <i>ANK3</i>     |
| <i>ABCD1P5</i>  | <i>KATNB1L1P2</i> | <i>ANXA1</i>    |
| <i>ATP1A1</i>   | <i>LAPTM4B</i>    | <i>Anxa2</i>    |
| <i>ATP1A1OS</i> | <i>MAPT</i>       | <i>APOE</i>     |
| <i>ATP1A2</i>   | <i>NACAD</i>      | <i>ARHGAP20</i> |
| <i>ATP1A3</i>   | <i>ABCA8</i>      | <i>B3GNT7</i>   |
| <i>ATP1A4</i>   | <i>ABCB1</i>      | <i>B4GALT2</i>  |
| <i>CACNA1A</i>  | <i>ABCB10</i>     | <i>BCL11A</i>   |
| <i>CACNA1A</i>  | <i>ABCB10P1</i>   | <i>CAMK4</i>    |
| <i>CACNA1B</i>  | <i>ABCB10P3</i>   | <i>CDH13</i>    |
| <i>CACNA1C</i>  | <i>ABCB10P4</i>   | <i>CHST5</i>    |
| <i>CACNA1C</i>  | <i>ABCB11</i>     | <i>CHST6</i>    |
| <i>CACNA1D</i>  | <i>ABCB4</i>      | <i>COLEC12</i>  |
| <i>CACNA1D</i>  | <i>ABCB5</i>      | <i>DGKH</i>     |
| <i>CACNA1E</i>  | <i>ABCB6</i>      | <i>DPP10</i>    |
| <i>CACNA1F</i>  | <i>ABCB7</i>      | <i>DYSF</i>     |
| <i>CACNA1F</i>  | <i>ABCB8</i>      | <i>ELMO1</i>    |
| <i>CACNA1G</i>  | <i>ABCB9</i>      | <i>ESR1</i>     |
| <i>CACNA1H</i>  | <i>ABHD1</i>      | <i>ESRRB</i>    |
| <i>CACNA1H</i>  | <i>ABHD10</i>     | <i>FMOD</i>     |
| <i>CACNA1I</i>  | <i>ABHD11</i>     | <i>GRIN2A</i>   |
| <i>CACNA1S</i>  | <i>ABHD12</i>     | <i>KERA</i>     |
| <i>CACNA2D1</i> | <i>ABHD12B</i>    | <i>LIPC</i>     |
| <i>CACNA2D2</i> | <i>ABHD13</i>     | <i>LRRC7</i>    |
| <i>CACNA2D3</i> | <i>ABHD14A</i>    | <i>LRRN3</i>    |
| <i>CACNA2D4</i> | <i>ABHD15</i>     | <i>LUM</i>      |
| <i>FSCN1</i>    | <i>ABHD16A</i>    | <i>LYPLAL1</i>  |
| <i>FSCN2</i>    | <i>ABHD16B</i>    | <i>MAPK1</i>    |
| <i>FSCN3</i>    | <i>ABHD17A</i>    | <i>NDN</i>      |
| <i>OBSCN</i>    | <i>ABHD17AP1</i>  | <i>NMU</i>      |
| <i>PRRT1</i>    | <i>ABHD17AP3</i>  | <i>NR4A2</i>    |
| <i>PRRT2</i>    | <i>ABHD17AP4</i>  | <i>OGN</i>      |
| <i>PRRT3</i>    | <i>ABHD17AP5</i>  | <i>OMD</i>      |
| <i>PRRT4</i>    | <i>ABHD17AP6</i>  | <i>PAWR</i>     |
| <i>SCN10A</i>   | <i>ABHD17B</i>    | <i>PCDH11X</i>  |
| <i>SCN10A</i>   | <i>ABHD17C</i>    | <i>PDE7B</i>    |
| <i>SCN11A</i>   | <i>ABHD18</i>     | <i>PLAT</i>     |
| <i>SCN11A</i>   | <i>ABHD2</i>      | <i>PLEKHG1</i>  |
| <i>SCN1A</i>    | <i>ABHD3</i>      | <i>PLG</i>      |
| <i>SCN1B</i>    | <i>ABHD4</i>      | <i>PPP1R3B</i>  |
| <i>SCN2A</i>    | <i>ABHD5</i>      | <i>PRELP</i>    |
| <i>SCN2B</i>    | <i>ABHD6</i>      | <i>PROX1</i>    |
| <i>SCN3A</i>    | <i>ABHD8</i>      | <i>RPS6KA1</i>  |
| <i>SCN3B</i>    | <i>ACAD10</i>     | <i>S100A10</i>  |
| <i>SCN4A</i>    | <i>ACAD11</i>     | <i>S100A4</i>   |
| <i>SCN4A</i>    | <i>ACAD8</i>      | <i>SCARA3</i>   |
| <i>SCN4B</i>    | <i>ACAD9</i>      | <i>SDCBP</i>    |
| <i>SCN5A</i>    | <i>ACADL</i>      | <i>SEMA3A</i>   |
| <i>SCN5A</i>    | <i>ACADM</i>      | <i>SERINC2</i>  |
| <i>SCN7A</i>    | <i>ACADS</i>      | <i>SLC17A7</i>  |
| <i>SCN8A</i>    | <i>ACADSB</i>     | <i>SLC26A4</i>  |

(continued)

SUPPLEMENTARY APPENDIX S1. (CONTINUED)

| <i>Tier 1</i> | <i>Tier 2</i>   | <i>Tier 3</i>  |
|---------------|-----------------|----------------|
| <i>SCN9A</i>  | <i>ACADVL</i>   | <i>SMC2</i>    |
| <i>SCN9A</i>  | <i>AFG3L1P</i>  | <i>SP6</i>     |
| <i>SCNM1</i>  | <i>AFG3L2</i>   | <i>TCEB1</i>   |
| <i>SCNN1A</i> | <i>AFG3L2P1</i> | <i>TGFB2</i>   |
| <i>SCNN1B</i> | <i>ANO1</i>     | <i>TRIM72</i>  |
| <i>SCNN1D</i> | <i>ANO10</i>    | <i>TSHZ2</i>   |
| <i>SCNN1G</i> | <i>ANO2</i>     | <i>TTLL7</i>   |
|               | <i>ANO3</i>     | <i>TYRP1</i>   |
|               | <i>ANO4</i>     | <i>UX2</i>     |
|               | <i>ANO5</i>     | <i>ZDHHC21</i> |
|               | <i>ANO6</i>     | <i>ZIC5</i>    |
|               | <i>ANO7</i>     | <i>CAPN1</i>   |
|               | <i>ANO7P1</i>   | <i>CAPN2</i>   |
|               | <i>ANO8</i>     | <i>CAPN3</i>   |
|               | <i>ANO9</i>     | <i>CAPN5</i>   |
|               | <i>ANOS1</i>    | <i>CAPN6</i>   |
|               | <i>APTX</i>     | <i>CAPN7</i>   |
|               | <i>ATCAY</i>    | <i>CAPN8</i>   |
|               | <i>ATM</i>      | <i>CAPN9</i>   |
|               | <i>ATMIN</i>    | <i>CAPN10</i>  |
|               | <i>ATN1</i>     | <i>CAPN11</i>  |
|               | <i>ATP2B2</i>   | <i>CAPN12</i>  |
|               | <i>ATP2B3</i>   | <i>CAPN13</i>  |
|               | <i>ATP2B4</i>   | <i>CAPN14</i>  |
|               | <i>ATXN1</i>    | <i>CAPN15</i>  |
|               | <i>ATXN10</i>   | <i>ADGB</i>    |
|               | <i>ATXN1L</i>   | <i>CASP1</i>   |
|               | <i>ATXN2</i>    | <i>CASP2</i>   |
|               | <i>ATXN2L</i>   | <i>CASP3</i>   |
|               | <i>ATXN3</i>    | <i>CASP4</i>   |
|               | <i>ATXN3L</i>   | <i>CASP5</i>   |
|               | <i>ATXN7</i>    | <i>CASP6</i>   |
|               | <i>ATXN7L1</i>  | <i>CASP7</i>   |
|               | <i>ATXN7L2</i>  | <i>CASP8</i>   |
|               | <i>ATXN7L3</i>  | <i>CASP9</i>   |
|               | <i>ATXN7L3B</i> | <i>CASP10</i>  |
|               | <i>ATXN8OS</i>  | <i>CASP12</i>  |
|               | <i>BEAN1</i>    | <i>CASP14</i>  |
|               | <i>C10orf2</i>  | <i>CASP16P</i> |
|               | <i>C10orf25</i> | <i>IL1B</i>    |
|               | <i>CA8</i>      | <i>IL1-RN</i>  |
|               | <i>CCDC88C</i>  | <i>IL6</i>     |
|               | <i>CDCA8</i>    | <i>IL8</i>     |
|               | <i>COQ10A</i>   | <i>IL10</i>    |
|               | <i>COQ10B</i>   | <i>PTGS2</i>   |
|               | <i>COQ10BP2</i> | <i>TNFA</i>    |
|               | <i>COQ2</i>     | <i>CCBP2</i>   |
|               | <i>COQ3</i>     | <i>CCL1</i>    |
|               | <i>COQ4</i>     | <i>CCL2</i>    |
|               | <i>COQ5</i>     | <i>CCL3</i>    |
|               | <i>COQ6</i>     | <i>CCL4</i>    |
|               | <i>COQ7</i>     | <i>CCL5</i>    |
|               | <i>COQ8B</i>    | <i>CCL6</i>    |
|               | <i>COQ9</i>     | <i>CCL7</i>    |
|               | <i>CTDP1</i>    | <i>CCL8</i>    |

(continued)

SUPPLEMENTARY APPENDIX S1. (CONTINUED)

| <i>Tier 1</i> | <i>Tier 2</i>    | <i>Tier 3</i> |
|---------------|------------------|---------------|
|               | <i>CWF19L1</i>   | <i>CCL9</i>   |
|               | <i>DCTPP1</i>    | <i>CCL11</i>  |
|               | <i>DNMT1</i>     | <i>CCL12</i>  |
|               | <i>DNMT3A</i>    | <i>CCL13</i>  |
|               | <i>DNMT3B</i>    | <i>CCL14</i>  |
|               | <i>DNMT3L</i>    | <i>CCL15</i>  |
|               | <i>EEF2</i>      | <i>CCL16</i>  |
|               | <i>EEF2K</i>     | <i>CCL17</i>  |
|               | <i>EEF2KMT</i>   | <i>CCL18</i>  |
|               | <i>ELOVL4</i>    | <i>CCL19</i>  |
|               | <i>ELOVL5</i>    | <i>CCL20</i>  |
|               | <i>FGF14</i>     | <i>CCL21</i>  |
|               | <i>FXN</i>       | <i>CCL22</i>  |
|               | <i>GAPT</i>      | <i>CCL23</i>  |
|               | <i>GATM</i>      | <i>CCL24</i>  |
|               | <i>GLTPP1</i>    | <i>CCL25</i>  |
|               | <i>GRID2</i>     | <i>CCL26</i>  |
|               | <i>GRID2IP</i>   | <i>CCL27</i>  |
|               | <i>GRM1</i>      | <i>CCL28</i>  |
|               | <i>ITPR1</i>     | <i>CCR1</i>   |
|               | <i>KATNA1</i>    | <i>CCR2</i>   |
|               | <i>KATNAL1</i>   | <i>CCR3</i>   |
|               | <i>KATNAL2</i>   | <i>CCR4</i>   |
|               | <i>KATNB1</i>    | <i>CCR5</i>   |
|               | <i>KATNBL1</i>   | <i>CCR6</i>   |
|               | <i>KATNBLIP1</i> | <i>CCR7</i>   |
|               | <i>KATNBLIP3</i> | <i>CCR8</i>   |
|               | <i>KATNBLIP4</i> | <i>CCR9</i>   |
|               | <i>KATNBLIP5</i> | <i>CCR10</i>  |
|               | <i>KATNBLIP6</i> | <i>CCRL2</i>  |
|               | <i>KCNC1</i>     | <i>CX3CL1</i> |
|               | <i>KCNC2</i>     | <i>CX3CR1</i> |
|               | <i>KCNC3</i>     | <i>CXCL1</i>  |
|               | <i>KCNC4</i>     | <i>CXCL2</i>  |
|               | <i>KCND1</i>     | <i>CXCL3</i>  |
|               | <i>KCND2</i>     | <i>CXCL4</i>  |
|               | <i>KCND3</i>     | <i>CXCL5</i>  |
|               | <i>LAPTM4A</i>   | <i>CXCL6</i>  |
|               | <i>LAPTM5</i>    | <i>CXCL7</i>  |
|               | <i>MAFG</i>      | <i>CXCL9</i>  |
|               | <i>MATN1</i>     | <i>CXCL9</i>  |
|               | <i>MATN2</i>     | <i>CXCL10</i> |
|               | <i>MATN3</i>     | <i>CXCL11</i> |
|               | <i>MATN4</i>     | <i>CXCL12</i> |
|               | <i>MIATNB</i>    | <i>CXCL13</i> |
|               | <i>NANOG</i>     | <i>CXCL14</i> |
|               | <i>NANOGNB</i>   | <i>CXCL15</i> |
|               | <i>NANOGNBP1</i> | <i>CXCL16</i> |
|               | <i>NANOGNBP2</i> | <i>CXCL17</i> |
|               | <i>NANOGNBP3</i> | <i>CXCR3</i>  |
|               | <i>NANOGP1</i>   | <i>CXCR4</i>  |
|               | <i>NANOGP10</i>  | <i>CXCR5</i>  |
|               | <i>NANOGP2</i>   | <i>CXCR6</i>  |
|               | <i>NANOGP3</i>   | <i>CXCR7</i>  |
|               | <i>NANOGP4</i>   | <i>DUFFY</i>  |
|               | <i>NANOGP5</i>   | <i>IL8</i>    |
|               | <i>NANOGP6</i>   | <i>IL8RA</i>  |
|               | <i>NANOGP7</i>   | <i>IL8RB</i>  |
|               | <i>NANOGP8</i>   | <i>ITGA4</i>  |
|               | <i>NANOGP9</i>   | <i>ITGB1</i>  |
|               | <i>NANOS1</i>    | <i>TREM1</i>  |
|               | <i>NANOS2</i>    | <i>TREM2</i>  |

SUPPLEMENTARY APPENDIX S1. (CONTINUED)

| <i>Tier 1</i> | <i>Tier 2</i>    | <i>Tier 3</i>  |
|---------------|------------------|----------------|
|               | <i>NANOS3</i>    | <i>TREM3</i>   |
|               | <i>NOP56</i>     | <i>XCL1</i>    |
|               | <i>PANO1</i>     | <i>XCR1</i>    |
|               | <i>PAPOLG</i>    | <i>GRIN1</i>   |
|               | <i>PDSS1</i>     | <i>GRIN2B</i>  |
|               | <i>PDSS2</i>     | <i>GRIN2C</i>  |
|               | <i>PDYN</i>      | <i>GRIN2D</i>  |
|               | <i>POLG</i>      | <i>GRIN3A</i>  |
|               | <i>POLG2</i>     | <i>GRIN3B</i>  |
|               | <i>PPP2R2A</i>   | <i>GRIA1</i>   |
|               | <i>PPP2R2B</i>   | <i>GRIA2</i>   |
|               | <i>PPP2R2C</i>   | <i>GRIA3</i>   |
|               | <i>PPP2R2D</i>   | <i>GRIA4</i>   |
|               | <i>PPP2R2DP1</i> | <i>TARDBP</i>  |
|               | <i>PRKCG</i>     | <i>APP</i>     |
|               | <i>RUBCN</i>     | <i>SNCA</i>    |
|               | <i>RUBCNL</i>    | <i>SOD1</i>    |
|               | <i>SACS</i>      | <i>FUS</i>     |
|               | <i>SETX</i>      | <i>ACE</i>     |
|               | <i>SFXN1</i>     | <i>ENPEP</i>   |
|               | <i>SFXN2</i>     | <i>NOS1</i>    |
|               | <i>SFXN3</i>     | <i>NOS2</i>    |
|               | <i>SFXN4</i>     | <i>NOS3</i>    |
|               | <i>SFXN5</i>     | <i>PHACTR1</i> |
|               | <i>SIL1</i>      | <i>COMT</i>    |
|               | <i>SLC1A3</i>    | <i>MAOA</i>    |
|               | <i>SPTBN2</i>    | <i>SLC1A2</i>  |
|               | <i>STUB1</i>     | <i>SLC17A7</i> |
|               | <i>SYNE1</i>     | <i>SLC6A4</i>  |
|               | <i>SYT14</i>     | <i>MTDH</i>    |
|               | <i>SYT14P1</i>   | <i>AGT</i>     |
|               | <i>TAPT1</i>     | <i>EDN1</i>    |
|               | <i>TBP</i>       | <i>EDN3</i>    |
|               | <i>TDP1</i>      | <i>BDNF</i>    |
|               | <i>TGM6</i>      | <i>CALCA</i>   |
|               | <i>TPP1</i>      | <i>AGTR2</i>   |
|               | <i>TTBK2</i>     | <i>ADRA2A</i>  |
|               | <i>TTPA</i>      | <i>EDNRB</i>   |
|               | <i>TTPAL</i>     | <i>HTR1A</i>   |
|               | <i>VAMP1</i>     | <i>HTR2A</i>   |
|               | <i>VLDLR</i>     | <i>ADORA1</i>  |
|               | <i>WWOX</i>      | <i>EDNRA</i>   |
|               | <i>ZNF592</i>    | <i>PTGER2</i>  |
|               | <i>OQ8A</i>      | <i>HTR1B</i>   |
|               |                  | <i>ABCC1</i>   |
|               |                  | <i>ABCC8</i>   |
|               |                  | <i>DUSPS</i>   |
|               |                  | <i>TRPM2</i>   |
|               |                  | <i>TRPM8</i>   |
|               |                  | <i>CACN2B4</i> |
|               |                  | <i>TRPM4</i>   |
|               |                  | <i>AQP4</i>    |
|               |                  | <i>MMP2</i>    |
|               |                  | <i>MMP3</i>    |
|               |                  | <i>MMP9</i>    |
|               |                  | <i>TSPO</i>    |

(continued)
